# Supplementary material
Source: PubMed Central journal article supplement (PMC6333426)
Supplement: NIHMS1510034-supplement-Supplementary_Tables.pdf [file NIHMS1510034-supplement-Supplementary_Tables.pdf]

**Table S1. Tomograms collected, Related to Figures 1 and 3.**

| Strain                                                              | Plasmid                                    | Sample                                  | Tomograms with filaments | Total tomograms collected |
|---------------------------------------------------------------------|--------------------------------------------|-----------------------------------------|--------------------------|---------------------------|
| EC93 <i>bamA</i> <sup>LT2</sup>                                     | none                                       | bacteria                                | 21                       | 21                        |
| EC93 $\Delta$ <i>cdiA</i>                                           | none                                       | bacteria                                | 0                        | 16                        |
| EPI100 $\Delta$ <i>bamA::cat</i> pZS21- <i>bamA</i> <sup>ECL</sup>  | pDAL660 $\Delta$ 1-39 CdiA <sup>EC93</sup> | bacteria                                | 21                       | 21                        |
| EPI100 $\Delta$ <i>bamA::cat</i> pZS21- <i>bamA</i> <sup>ECL</sup>  | pDAL660 $\Delta$ 1-39 CdiA <sup>EC93</sup> | minicells                               | 24                       | 24                        |
| EPI100 $\Delta$ <i>bamA::cat</i> pZS21- <i>bamA</i> <sup>ECL</sup>  | pDAL660 $\Delta$ 1-39 CdiA <sup>EC93</sup> | bacteria + solubilized BamA             | 3                        | 3                         |
| EPI100 $\Delta$ <i>bamA::cat</i> pZS21- <i>bamA</i> <sup>ECL</sup>  | pDAL660 $\Delta$ 1-39 CdiA <sup>EC93</sup> | minicells + buffer/detergent            | 6                        | 6                         |
| EPI100 $\Delta$ <i>bamA::cat</i> pZS21- <i>bamA</i> <sup>ECL</sup>  | pDAL660 $\Delta$ 1-39 CdiA <sup>EC93</sup> | minicells + solubilized BamA            | 38                       | 38                        |
| EPI100 $\Delta$ <i>bamA::cat</i> pZS21- <i>bamA</i> <sup>ECL</sup>  | pDAL660 $\Delta$ 1-39 CdiA <sup>EC93</sup> | minicells + target minicells (vesicles) | 42                       | 42                        |
| EPI100 $\Delta$ <i>bamA::cat</i> pZS21- <i>bamA</i> <sup>ECL</sup>  | pWEB-TNC (no CdiA)                         | minicells                               | 0                        | 11                        |
| EPI100 $\Delta$ <i>bamA::cat</i> pZS21- <i>bamA</i> <sup>ECL</sup>  | pCH12707 CdiA(Gly1318) <sup>EC93</sup>     | minicells                               | 0                        | 17                        |
| EPI100 $\Delta$ <i>bamA::cat</i> pZS21- <i>bamA</i> <sup>ECL</sup>  | pCH12705 CdiA(Thr2122) <sup>EC93</sup>     | minicells                               | 14                       | 14                        |
| EPI100 $\Delta$ <i>bamA::cat</i> pZS21- <i>bamA</i> <sup>ECL</sup>  | pCH12706 CdiA(Val1929) <sup>EC93</sup>     | minicells                               | 10                       | 10                        |
| EPI100 $\Delta$ <i>bamA::cat</i> pZS21- <i>bamA</i> <sup>ECL</sup>  | pZR113 CdiA(Ser832) <sup>EC93</sup>        | minicells                               | 0                        | 13                        |
| MG1655 $\Delta$ <i>wzb</i> $\Delta$ <i>tsx</i> $\Delta$ <i>ompT</i> | pET21b (no CdiA)                           | bacteria                                | 0                        | 11                        |
| MG1655 $\Delta$ <i>wzb</i> $\Delta$ <i>tsx</i> $\Delta$ <i>ompT</i> | pET21b (no CdiA)                           | minicells                               | 0                        | 1                         |
| MG1655 $\Delta$ <i>wzb</i> $\Delta$ <i>tsx</i> $\Delta$ <i>ompT</i> | pCH13604 CdiA <sup>STECO31</sup>           | bacteria                                | 14                       | 14                        |
| MG1655 $\Delta$ <i>wzb</i> $\Delta$ <i>tsx</i> $\Delta$ <i>ompT</i> | pCH13604 CdiA <sup>STECO31</sup>           | minicells                               | 23                       | 23                        |

**Table S2. CdiA domain analysis, Related to Figures 7B and 7C.**

| NCBI identifier                | Bacterial species and strain                   | CdiA length | FHA-1 region |      |        | RBD <sup>a</sup> |      |        | YP domain |      |        | FHA-2 domain <sup>b</sup> |      |        |
|--------------------------------|------------------------------------------------|-------------|--------------|------|--------|------------------|------|--------|-----------|------|--------|---------------------------|------|--------|
|                                |                                                |             | begin        | end  | length | begin            | end  | length | begin     | end  | length | begin                     | end  | length |
| WP_109054141.1                 | <i>Brenneria roseae</i> subsp. americana       | 5237        | 392          | 3171 | 2780   | 3172             | 3619 | 448    | 3620      | 3805 | 186    | 3979                      | 4656 | 678    |
| <a href="#">WP_095834043.1</a> | <i>Brenneria goodwinii</i> FRB141              | 5550        | 477          | 3114 | 2638   | 3115             | 3562 | 448    | 3563      | 3748 | 186    | 4054                      | 4863 | 810    |
| WP_053085546.1                 | <i>Brenneria goodwinii</i> OBR1                | 5538        | 477          | 3114 | 2638   | 3115             | 3552 | 438    | 3553      | 3738 | 186    | 4044                      | 4853 | 810    |
| WP_064541030.1                 | <i>Buttiauxella ferruginae</i> ATCC 51602      | 3961        | 312          | 2025 | 1714   | 2026             | 2362 | 337    | 2363      | 2547 | 185    | 2717                      | 3321 | 605    |
| WP_051880442.1                 | <i>Buttiauxella agrestis</i> MCE               | 3828        | 311          | 1896 | 1586   | 1897             | 2220 | 324    | 2221      | 2405 | 185    | 2420                      | 3179 | 760    |
| WP_039294138.1                 | <i>Cedecea neteri</i> M006                     | 5018        | 310          | 2694 | 2385   | 2695             | 3094 | 400    | 3095      | 3279 | 185    | 3448                      | 4320 | 873    |
| WP_038482520.1                 | <i>Cedecea neteri</i> SSM004                   | 4373        | 310          | 2383 | 2074   | 2384             | 2790 | 407    | 2791      | 2975 | 185    | 3144                      | 3689 | 546    |
| <a href="#">WP_061277518.1</a> | <i>Cedecea neteri</i> NBRC 105707              | 4616        | 310          | 2696 | 2387   | 2697             | 3114 | 418    | 3115      | 3299 | 185    | 3468                      | 4013 | 546    |
| WP_039303703.1                 | <i>Cedecea neteri</i> ND14a                    | 4668        | 310          | 2696 | 2387   | 2697             | 3111 | 415    | 3112      | 3296 | 185    | 3326                      | 4073 | 748    |
| WP_016151891.1                 | <i>Citrobacter</i> sp. KTE151                  | 3318        | 309          | 1386 | 1078   | 1387             | 1662 | 276    | 1663      | 1847 | 185    | 2072                      | 2625 | 554    |
| WP_052406297.1                 | <i>Citrobacter sedlakii</i> NBRC 105722        | 3142        | 309          | 1262 | 954    | 1263             | 1557 | 295    | 1558      | 1742 | 185    | 1897                      | 2519 | 623    |
| WP_052443881.1                 | <i>Citrobacter</i> sp. JT3                     | 3602        | 310          | 1357 | 1048   | 1358             | 1660 | 303    | 1661      | 1845 | 185    | 2005                      | 2948 | 944    |
| WP_102602775.1                 | <i>Citrobacter freundii</i> complex sp. CFNIH2 | 3629        | 310          | 1357 | 1048   | 1358             | 1660 | 303    | 1661      | 1845 | 185    | 2005                      | 2948 | 944    |
| WP_049042230.1                 | <i>Citrobacter braakii</i> 989_CKOS            | 3950        | 309          | 2001 | 1693   | 2002             | 2345 | 344    | 2346      | 2530 | 185    | 2639                      | 3305 | 667    |
| WP_016155806.1                 | <i>Citrobacter</i> sp. KTE32                   | 3950        | 309          | 2001 | 1693   | 2002             | 2345 | 344    | 2346      | 2530 | 185    | 2707                      | 3379 | 673    |
| WP_052746947.1                 | <i>Citrobacter amalonaticus</i> Y19            | 3628        | 310          | 1357 | 1048   | 1358             | 1657 | 300    | 1658      | 1842 | 185    | 1997                      | 2952 | 956    |
| WP_109017325.1                 | <i>Citrobacter freundii</i> MH16-522D          | 3950        | 309          | 2001 | 1693   | 2002             | 2345 | 344    | 2346      | 2530 | 185    | 2707                      | 3379 | 673    |
| WP_105242179.1                 | <i>Citrobacter</i> sp. FDAARGOS_156            | 3985        | 352          | 2002 | 1651   | 2003             | 2346 | 344    | 2347      | 2531 | 185    | 2693                      | 3308 | 616    |
| WP_080625654.1                 | <i>Citrobacter braakii</i> FDAARGOS_253        | 3950        | 309          | 2001 | 1693   | 2002             | 2345 | 344    | 2346      | 2530 | 185    | 2697                      | 3379 | 683    |
| WP_047413132.1                 | <i>Citrobacter freundii</i> FDAARGOS_61        | 3950        | 309          | 2001 | 1693   | 2002             | 2345 | 344    | 2346      | 2530 | 185    | 2697                      | 3379 | 683    |
| WP_087051660.1                 | <i>Citrobacter europaeus</i> A121              | 3950        | 309          | 2001 | 1693   | 2002             | 2345 | 344    | 2346      | 2530 | 185    | 2697                      | 3379 | 683    |
| WP_043015339.1                 | <i>Citrobacter freundii</i> MGH 56             | 3880        | 309          | 2001 | 1693   | 2002             | 2345 | 344    | 2346      | 2530 | 185    | 2707                      | 3379 | 673    |
| WP_087053097.1                 | <i>Citrobacter europaeus</i> 97/99             | 3950        | 309          | 2001 | 1693   | 2002             | 2345 | 344    | 2346      | 2530 | 185    | 2697                      | 3379 | 683    |
| WP_085047670.1                 | <i>Citrobacter werkmanii</i> AK-8              | 3929        | 309          | 2001 | 1693   | 2002             | 2345 | 344    | 2346      | 2530 | 185    | 2707                      | 3307 | 601    |
| WP_103283520.1                 | <i>Citrobacter freundii</i> complex sp. CFNIH3 | 3962        | 330          | 2001 | 1672   | 2002             | 2357 | 356    | 2358      | 2542 | 185    | 2719                      | 3391 | 673    |
| WP_103765923.1                 | <i>Citrobacter braakii</i> S1283               | 3825        | 309          | 2001 | 1693   | 2002             | 2329 | 328    | 2330      | 2514 | 185    | 2691                      | 3287 | 597    |
| WP_101700591.1                 | <i>Citrobacter</i> sp. L55                     | 3901        | 309          | 2001 | 1693   | 2002             | 2329 | 328    | 2330      | 2514 | 185    | 2691                      | 3363 | 673    |
| WP_075846765.1                 | <i>Citrobacter braakii</i> SCC4                | 3934        | 309          | 2001 | 1693   | 2002             | 2329 | 328    | 2330      | 2514 | 185    | 2691                      | 3363 | 673    |
| WP_016151957.1                 | <i>Citrobacter</i> sp. KTE151                  | 3901        | 309          | 2001 | 1693   | 2002             | 2329 | 328    | 2330      | 2514 | 185    | 2691                      | 3289 | 599    |
| WP_019076112.1                 | <i>Citrobacter freundii</i> str. Ballerup 7851 | 3901        | 309          | 2001 | 1693   | 2002             | 2329 | 328    | 2330      | 2514 | 185    | 2691                      | 3287 | 597    |
| WP_100194023.1                 | <i>Citrobacter freundii</i> CRCB-101           | 3962        | 309          | 2001 | 1693   | 2002             | 2357 | 356    | 2358      | 2542 | 185    | 2709                      | 3391 | 683    |
| WP_023639573.1                 | <i>Dickeya zeae</i> NCPPB 3532                 | 3008        | 307          | 1104 | 798    | 1105             | 1409 | 305    | 1410      | 1594 | 185    | 1705                      | 2304 | 600    |
| WP_019845538.1                 | <i>Dickeya zeae</i> MS1                        | 2975        | 307          | 1104 | 798    | 1105             | 1392 | 288    | 1393      | 1577 | 185    | 1743                      | 2355 | 613    |
| WP_046830404.1                 | <i>Dickeya dianthicola</i> RNS04.9             | 3839        | 288          | 1906 | 1619   | 1907             | 2278 | 372    | 2279      | 2463 | 185    | 2626                      | 3240 | 615    |
| WP_050568668.1                 | <i>Dickeya zeae</i> NCPPB 2538                 | 3222        | 307          | 1104 | 798    | 1105             | 1421 | 317    | 1422      | 1607 | 186    | 1844                      | 2652 | 809    |
| <a href="#">AAN38708.1</a>     | <i>Dickeya chrysanthemi</i> EC16               | 3848        | 512          | 1901 | 1390   | 1902             | 2263 | 362    | 2264      | 2449 | 186    | 2551                      | 3172 | 622    |
| WP_081251380.1                 | <i>Dickeya solani</i> IPO 2222                 | 4165        | 309          | 1933 | 1625   | 1934             | 2305 | 372    | 2306      | 2491 | 186    | 2599                      | 3536 | 938    |
| WP_013318031.1                 | <i>Dickeya dadanti</i> 3937                    | 4148        | 320          | 2116 | 1797   | 2117             | 2480 | 364    | 2481      | 2666 | 186    | 2776                      | 3391 | 616    |
| ACS85791.1                     | <i>Dickeya paradisiaca</i> Ech703              | 3862        | 512          | 1904 | 1393   | 1905             | 2270 | 366    | 2271      | 2454 | 184    | 2617                      | 3230 | 614    |
| WP_107759469.1                 | <i>Dickeya</i> sp. Seccp 1600                  | 4339        | 437          | 2061 | 1625   | 2062             | 2428 | 367    | 2429      | 2614 | 186    | 2724                      | 3661 | 938    |
| WP_100849600.1                 | <i>Dickeya fangzhongdai</i> DSM 101947         | 4031        | 437          | 2059 | 1623   | 2060             | 2427 | 368    | 2428      | 2613 | 186    | 2721                      | 3336 | 616    |
| WP_071842415.1                 | <i>Dickeya solani</i> ND14b                    | 4231        | 438          | 2059 | 1622   | 2060             | 2432 | 373    | 2433      | 2618 | 186    | 2726                      | 3663 | 938    |
| WP_100849620.1                 | <i>Dickeya fangzhongdai</i> DSM 101947         | 4056        | 437          | 2042 | 1606   | 2043             | 2410 | 368    | 2411      | 2596 | 186    | 2704                      | 3319 | 616    |
| WP_101744646.1                 | <i>Enterobacter</i> sp. Crenshaw               | 4465        | 311          | 2162 | 1852   | 2163             | 2487 | 325    | 2488      | 2673 | 186    | 2832                      | 3779 | 948    |
| WP_084832595.1                 | <i>Enterobacter cloacae</i> UCI 39             | 4142        | 311          | 2163 | 1853   | 2164             | 2488 | 325    | 2489      | 2674 | 186    | 2833                      | 3449 | 617    |
| WP_011915321.1                 | <i>Enterobacter</i> sp. 638                    | 3967        | 311          | 2120 | 1810   | 2121             | 2445 | 325    | 2446      | 2631 | 186    | 2970                      | 3407 | 438    |
| WP_106994740.1                 | <i>Enterobacter</i> sp. FS01                   | 3002        | 309          | 1212 | 904    | 1213             | 1504 | 292    | 1505      | 1689 | 185    | 1850                      | 2399 | 550    |
| KDF47155.1                     | <i>Enterobacter cloacae</i> BIDMC 67           | 3195        | 310          | 1495 | 1186   | 1496             | 1768 | 273    | 1769      | 1953 | 185    | 2056                      | 2660 | 605    |
| WP_062856360.1                 | <i>Enterobacter</i> sp. RC4                    | 3292        | 309          | 1495 | 1187   | 1496             | 1768 | 273    | 1769      | 1953 | 185    | 2047                      | 2663 | 617    |
| ESN17358.1                     | <i>Enterobacter</i> sp. MGH 24                 | 3243        | 309          | 1535 | 1227   | 1536             | 1808 | 273    | 1809      | 1993 | 185    | 2096                      | 2700 | 605    |
| WP_006812043.1                 | <i>Enterobacter hormaechei</i> ATCC 49162      | 3436        | 684          | 1536 | 853    | 1537             | 1829 | 293    | 1830      | 2014 | 185    | 2247                      | 2791 | 545    |
| <a href="#">WP_084832630.1</a> | <i>Enterobacter cloacae</i> MGH 54             | 4214        | 311          | 2163 | 1853   | 2164             | 2505 | 342    | 2506      | 2690 | 185    | 2850                      | 3466 | 617    |
| WP_084833443.1                 | <i>Enterobacter cloacae</i> e2161              | 4154        | 311          | 2163 | 1853   | 2164             | 2500 | 337    | 2501      | 2686 | 186    | 2845                      | 3461 | 617    |

|                |                                               |      |     |      |      |      |      |     |      |      |     |      |      |      |
|----------------|-----------------------------------------------|------|-----|------|------|------|------|-----|------|------|-----|------|------|------|
| WP_096179245.1 | <i>Enterobacter asburiae</i> TUM10688         | 4043 | 273 | 2162 | 1890 | 2163 | 2498 | 336 | 2499 | 2684 | 186 | 2843 | 3459 | 617  |
| WP_046091940.1 | <i>Enterobacter cloacae</i> MNCRE16           | 4225 | 311 | 2163 | 1853 | 2164 | 2500 | 337 | 2501 | 2686 | 186 | 2845 | 3466 | 622  |
| WP_073980716.1 | <i>Enterobacter ludwigii</i> EnVs6            | 3500 | 274 | 1708 | 1435 | 1709 | 2015 | 307 | 2016 | 2199 | 184 | 2422 | 2907 | 486  |
| WP_084832228.1 | <i>Enterobacter cloacae</i> complex sp. 20432 | 4209 | 311 | 2163 | 1853 | 2164 | 2500 | 337 | 2501 | 2686 | 186 | 2845 | 3461 | 617  |
| WP_084833300.1 | <i>Enterobacter cloacae</i> DSM 16690         | 4381 | 311 | 2163 | 1853 | 2164 | 2499 | 336 | 2500 | 2685 | 186 | 2844 | 3791 | 948  |
| WP_023345176.1 | <i>Enterobacter</i> sp. MGH 16                | 4214 | 311 | 2163 | 1853 | 2164 | 2505 | 342 | 2506 | 2691 | 186 | 2850 | 3466 | 617  |
| WP_001385946.1 | <i>Escherichia coli</i> STEC_O31              | 3253 | 310 | 1384 | 1075 | 1385 | 1656 | 272 | 1657 | 1841 | 185 | 1996 | 2548 | 553  |
| AAZ57198.1     | <i>Escherichia coli</i> EC93                  | 3132 | 310 | 1378 | 1069 | 1379 | 1635 | 257 | 1636 | 1820 | 185 | 2050 | 2526 | 477  |
| WP_029589770.1 | <i>Franconibacter helveticus</i> LMB 23732    | 4374 | 311 | 2363 | 2053 | 2364 | 2709 | 346 | 2710 | 2915 | 206 | 3137 | 3695 | 559  |
| WP_073859864.1 | <i>Franconibacter pulveris</i> DJ34           | 4171 | 312 | 2363 | 2052 | 2364 | 2689 | 326 | 2690 | 2895 | 206 | 3061 | 3678 | 618  |
| WP_106930237.1 | <i>Kluyvera ascorbata</i> KA2                 | 3302 | 309 | 1386 | 1078 | 1387 | 1670 | 284 | 1671 | 1855 | 185 | 2017 | 2707 | 691  |
| WP_064567413.1 | <i>Kosakonia oryzae</i> Ola 51                | 3984 | 310 | 1933 | 1624 | 1934 | 2265 | 332 | 2266 | 2450 | 185 | 2482 | 3235 | 754  |
| WP_074775709.1 | <i>Kosakonia sacchari</i> SP1                 | 3980 | 311 | 1644 | 1334 | 1645 | 1978 | 334 | 1979 | 2163 | 185 | 2195 | 3272 | 1078 |
| SKC22705.1     | <i>Kosakonia oryzae</i> D4                    | 3665 | 310 | 1759 | 1450 | 1760 | 2091 | 332 | 2092 | 2276 | 185 | 2369 | 3061 | 693  |
| WP_107146251.1 | <i>Kosakonia</i> sp. H7A                      | 3671 | 310 | 1759 | 1450 | 1760 | 2097 | 338 | 2098 | 2282 | 185 | 2314 | 3067 | 754  |
| KDE37341.1     | <i>Kosakonia radicincitans</i> UMEnt01/12     | 3671 | 310 | 1759 | 1450 | 1760 | 2097 | 338 | 2098 | 2282 | 185 | 2314 | 3067 | 754  |
| WP_083565982.1 | <i>Kosakonia radicincitans</i> GXGL-4A        | 3705 | 310 | 1759 | 1450 | 1760 | 2131 | 372 | 2132 | 2316 | 185 | 2348 | 3101 | 754  |
| WP_052502032.1 | <i>Kosakonia radicincitans</i> YD4            | 4124 | 310 | 1759 | 1450 | 1760 | 2131 | 372 | 2132 | 2316 | 185 | 2427 | 3425 | 999  |
| WP_094419452.1 | <i>Kosakonia cowanii</i> Esp_Z                | 4959 | 310 | 2850 | 2541 | 2851 | 3186 | 336 | 3187 | 3458 | 272 | 3628 | 4242 | 615  |
| WP_082142181.1 | <i>Leclercia</i> sp. LK8                      | 4141 | 311 | 2163 | 1853 | 2164 | 2488 | 325 | 2489 | 2674 | 186 | 2833 | 3449 | 617  |
| WP_082019608.1 | <i>Leclercia adecarboxylata</i> KY2           | 3024 | 312 | 1251 | 940  | 1252 | 1524 | 273 | 1521 | 1706 | 186 | 1862 | 2411 | 550  |
| WP_036108049.1 | <i>Mangrovibacter</i> sp. MFB070              | 3577 | 311 | 1709 | 1399 | 1710 | 2033 | 324 | 2034 | 2219 | 186 | 2303 | 3003 | 701  |
| WP_083581958.1 | <i>Pantoea sesami</i> Si-M154                 | 3304 | 310 | 1496 | 1187 | 1497 | 1769 | 273 | 1770 | 1954 | 185 | 2057 | 2661 | 605  |
| WP_052696968.1 | <i>Pantoea</i> sp. SM3                        | 4171 | 311 | 1941 | 1631 | 1942 | 2278 | 337 | 2279 | 2462 | 184 | 2615 | 3483 | 869  |
| WP_109718305.1 | <i>Pantoea allii</i> PNA 200-10               | 4266 | 312 | 2033 | 1722 | 2034 | 2361 | 328 | 2362 | 2545 | 184 | 2707 | 3629 | 923  |
| WP_105077596.1 | <i>Pantoea ananatis</i> PANS 99-23            | 3976 | 311 | 2033 | 1723 | 2034 | 2361 | 328 | 2362 | 2545 | 184 | 2708 | 3320 | 613  |
| WP_081138203.1 | <i>Pantoea latae</i> AS1                      | 3884 | 394 | 1935 | 1542 | 1936 | 2261 | 326 | 2262 | 2445 | 184 | 2614 | 3225 | 612  |
| WP_081049483.1 | <i>Pantoea stewartii</i> RSA30                | 4032 | 311 | 2033 | 1723 | 2034 | 2361 | 328 | 2362 | 2545 | 184 | 2546 | 3320 | 775  |
| WP_014593028.1 | <i>Pantoea ananatis</i> AJ13355               | 3728 | 314 | 1764 | 1451 | 1765 | 2113 | 349 | 2114 | 2297 | 184 | 2298 | 3072 | 775  |
| WP_013024799.1 | <i>Pantoea ananatis</i> LMG 20103             | 3667 | 311 | 1761 | 1451 | 1762 | 2091 | 330 | 2092 | 2275 | 184 | 2276 | 3055 | 780  |
| SFN23123.1     | <i>Pantoea</i> sp. OV426                      | 4089 | 312 | 1826 | 1515 | 1827 | 2161 | 335 | 2162 | 2345 | 184 | 2442 | 3445 | 1004 |
| WP_080752852.1 | <i>Pantoea stewartii</i> M009                 | 4046 | 311 | 2033 | 1723 | 2034 | 2326 | 293 | 2327 | 2510 | 184 | 2603 | 3296 | 688  |
| WP_081316794.1 | <i>Pantoea stewartii</i> NS381                | 4322 | 311 | 2033 | 1723 | 2034 | 2382 | 349 | 2383 | 2566 | 184 | 2567 | 3653 | 1087 |
| WP_085067788.1 | <i>Pantoea alhagi</i> LTYR-11Z                | 3779 | 312 | 1728 | 1417 | 1729 | 2065 | 337 | 2066 | 2251 | 186 | 2422 | 3030 | 609  |
| WP_081325946.1 | <i>Pantoea agglomerans</i> C410P1             | 4169 | 311 | 1865 | 1555 | 1866 | 2212 | 347 | 2213 | 2398 | 186 | 2781 | 3496 | 716  |
| WP_082787945.1 | <i>Pantoea vagans</i> FaVv11                  | 4150 | 311 | 1865 | 1555 | 1866 | 2193 | 328 | 2194 | 2378 | 185 | 2562 | 3477 | 916  |
| WP_013358311.1 | <i>Pantoea vagans</i> C9-1                    | 4320 | 311 | 1978 | 1668 | 1979 | 2319 | 341 | 2320 | 2504 | 185 | 2679 | 3603 | 925  |
| WP_104093316.1 | <i>Pantoea</i> sp. ICBG 985                   | 3571 | 275 | 1614 | 1340 | 1615 | 1914 | 300 | 1915 | 2116 | 202 | 2231 | 2893 | 663  |
| WP_088517282.1 | <i>Pantoea</i> sp. VS1                        | 3515 | 275 | 1614 | 1340 | 1615 | 1905 | 291 | 1906 | 2107 | 202 | 2279 | 2884 | 606  |
| POY59994.1     | <i>Pectobacterium maceratum</i> PB70          | 5651 | 464 | 3561 | 3098 | 3562 | 4052 | 491 | 4053 | 4238 | 186 | 4405 | 5014 | 610  |
| WP_072034242.1 | <i>Pectobacterium carotovorum</i> M022        | 5051 | 495 | 2967 | 2473 | 2968 | 3406 | 439 | 3407 | 3592 | 186 | 3759 | 4368 | 610  |
| WP_014915528.1 | <i>Pectobacterium carotovorum</i> PCC21       | 5819 | 292 | 3696 | 3405 | 3697 | 4196 | 500 | 4197 | 4382 | 186 | 4556 | 5158 | 603  |
| WP_014915291.1 | <i>Pectobacterium carotovorum</i> PCC21       | 6075 | 292 | 3660 | 3369 | 3661 | 4149 | 489 | 4150 | 4335 | 186 | 4509 | 5445 | 937  |
| WP_095994655.1 | <i>Pectobacterium polaris</i> NIBIO1006       | 6217 | 292 | 3749 | 3458 | 3750 | 4244 | 495 | 4245 | 4430 | 186 | 4597 | 5540 | 944  |
| SHG12251.1     | <i>Pectobacterium carotovorum</i> DSM 30168   | 5857 | 496 | 3668 | 3173 | 3669 | 4164 | 496 | 4165 | 4350 | 186 | 4517 | 5126 | 610  |
| PPE62299.1     | <i>Pectobacterium carotovorum</i> F157        | 5839 | 288 | 3666 | 3379 | 3667 | 4142 | 476 | 4143 | 4328 | 186 | 4502 | 5104 | 603  |
| PPE64673.1     | <i>Pectobacterium carotovorum</i> F152        | 6442 | 496 | 4303 | 3808 | 4304 | 4853 | 550 | 4854 | 5039 | 186 | 5213 | 5815 | 603  |
| AVT58658.1     | <i>Pectobacterium carotovorum</i> 3-2         | 5749 | 519 | 3673 | 3155 | 3674 | 4168 | 495 | 4169 | 4354 | 186 | 4528 | 5130 | 603  |
| POY56417.1     | <i>Pectobacterium maceratum</i> F018          | 5747 | 520 | 3654 | 3135 | 3655 | 4148 | 494 | 4149 | 4334 | 186 | 4508 | 5110 | 603  |
| WP_080735406.1 | <i>Pectobacterium carotovorum</i> NCPPB 3839  | 5845 | 500 | 3669 | 3170 | 3670 | 4181 | 512 | 4182 | 4367 | 186 | 4534 | 5143 | 610  |
| PVY74713.1     | <i>Pectobacterium carotovorum</i> WS2152      | 5889 | 500 | 3710 | 3211 | 3711 | 4196 | 486 | 4197 | 4382 | 186 | 4550 | 5158 | 609  |
| WP_094369960.1 | <i>Pectobacterium carotovorum</i> BF45        | 5785 | 292 | 3667 | 3376 | 3668 | 4162 | 495 | 4163 | 4348 | 186 | 4522 | 5124 | 603  |
| WP_080768449.1 | <i>Pectobacterium carotovorum</i> YC D64      | 6059 | 287 | 3650 | 3364 | 3651 | 4136 | 486 | 4137 | 4322 | 186 | 4496 | 5432 | 937  |
| AIK14231.1     | <i>Pectobacterium atrosepticum</i> 21A        | 5753 | 472 | 3681 | 3210 | 3682 | 4157 | 476 | 4158 | 4343 | 186 | 4458 | 5119 | 662  |
| WP_025920092.1 | <i>Pectobacterium parmentieri</i> CFIA1002    | 5448 | 289 | 3030 | 2742 | 3031 | 3474 | 444 | 3475 | 3660 | 186 | 3834 | 4766 | 933  |

|                       |                                                 |             |     |      |             |      |      |            |      |      |            |      |      |            |
|-----------------------|-------------------------------------------------|-------------|-----|------|-------------|------|------|------------|------|------|------------|------|------|------------|
| <b>ACX88282.1</b>     | <b><i>Pectobacterium parmentieri</i> WPP163</b> | <b>5981</b> | 289 | 3630 | <b>3342</b> | 3631 | 4106 | <b>476</b> | 4107 | 4292 | <b>186</b> | 4407 | 5397 | <b>991</b> |
| WP_074824325.1        | <i>Pragia fontium</i> ATCC 49100                | <b>3121</b> | 335 | 947  | <b>613</b>  | 948  | 1195 | <b>248</b> | 1196 | 1380 | <b>185</b> | 1549 | 2435 | <b>887</b> |
| WP_013575347.1        | <i>Rahnella</i> sp. Y9602                       | <b>3756</b> | 312 | 1813 | <b>1502</b> | 1814 | 2101 | <b>288</b> | 2102 | 2327 | <b>226</b> | 2485 | 3102 | <b>618</b> |
| WP_015689887.1        | <i>Rahnella aquatilis</i> HX2                   | <b>3756</b> | 312 | 1813 | <b>1502</b> | 1814 | 2101 | <b>288</b> | 2102 | 2327 | <b>226</b> | 2485 | 3102 | <b>618</b> |
| AEX52032.1            | <i>Rahnella aquatilis</i> ATCC 33071            | <b>3895</b> | 312 | 1953 | <b>1642</b> | 1954 | 2243 | <b>290</b> | 2244 | 2469 | <b>226</b> | 2627 | 3246 | <b>620</b> |
| WP_086935272.1        | <i>Rahnella aquatilis</i> ATCC 33071            | <b>3901</b> | 318 | 1959 | <b>1642</b> | 1960 | 2249 | <b>290</b> | 2250 | 2475 | <b>226</b> | 2633 | 3252 | <b>620</b> |
| WP_101079777.1        | <i>Rahnella</i> sp. AA                          | <b>3431</b> | 279 | 1594 | <b>1316</b> | 1595 | 1884 | <b>290</b> | 1885 | 2082 | <b>198</b> | 2240 | 2860 | <b>621</b> |
| WP_082001717.1        | <i>Rahnella aquatilis</i> OV588                 | <b>3887</b> | 312 | 1954 | <b>1643</b> | 1955 | 2242 | <b>288</b> | 2243 | 2488 | <b>246</b> | 2646 | 3265 | <b>620</b> |
| WP_102076025.1        | <i>Rahnella victoriana</i> BRK18a               | <b>4027</b> | 312 | 2030 | <b>1719</b> | 2031 | 2318 | <b>288</b> | 2319 | 2564 | <b>246</b> | 2722 | 3342 | <b>621</b> |
| WP_071683781.1        | <i>Serratia fonticola</i> AeS1                  | <b>3994</b> | 298 | 2000 | <b>1703</b> | 2001 | 2332 | <b>332</b> | 2333 | 2517 | <b>185</b> | 2751 | 3297 | <b>547</b> |
| WP_065683710.1        | <i>Serratia</i> sp. 14-2641                     | <b>3848</b> | 297 | 2000 | <b>1704</b> | 2001 | 2332 | <b>332</b> | 2333 | 2517 | <b>185</b> | 2689 | 3297 | <b>609</b> |
| WP_004956787.1        | <i>Serratia odorifera</i> DSM 4582              | <b>3986</b> | 297 | 2000 | <b>1704</b> | 2001 | 2342 | <b>342</b> | 2343 | 2527 | <b>185</b> | 2752 | 3307 | <b>556</b> |
| WP_051791190.1        | <i>Serratia</i> sp. DD3                         | <b>3350</b> | 335 | 1484 | <b>1150</b> | 1485 | 1768 | <b>284</b> | 1769 | 1953 | <b>185</b> | 2053 | 2735 | <b>683</b> |
| WP_013814704.1        | <i>Serratia plymuthica</i> AS9                  | <b>3314</b> | 419 | 1464 | <b>1046</b> | 1465 | 1748 | <b>284</b> | 1749 | 1933 | <b>185</b> | 2101 | 2642 | <b>542</b> |
| WP_020439873.1        | <i>Serratia plymuthica</i> S13                  | <b>3337</b> | 313 | 1464 | <b>1152</b> | 1465 | 1746 | <b>282</b> | 1747 | 1931 | <b>185</b> | 2098 | 2714 | <b>617</b> |
| <b>WP_012147097.1</b> | <b><i>Serratia proteamaculans</i> 568</b>       | <b>3040</b> | 313 | 1164 | <b>852</b>  | 1165 | 1432 | <b>268</b> | 1433 | 1617 | <b>185</b> | 1784 | 2400 | <b>617</b> |
| WP_017894168.1        | <i>Serratia</i> sp. S4                          | <b>2993</b> | 313 | 1164 | <b>852</b>  | 1165 | 1432 | <b>268</b> | 1433 | 1617 | <b>185</b> | 1784 | 2400 | <b>617</b> |
| WP_084297639.1        | <i>Serratia</i> sp. ATCC 39006                  | <b>3690</b> | 300 | 1812 | <b>1513</b> | 1813 | 2155 | <b>343</b> | 2156 | 2341 | <b>186</b> | 2452 | 3049 | <b>598</b> |
| WP_049254954.1        | <i>Shigella boydii</i> 1221_SBOY                | <b>3213</b> | 309 | 1398 | <b>1090</b> | 1399 | 1655 | <b>257</b> | 1656 | 1840 | <b>185</b> | 2070 | 2546 | <b>477</b> |
| <b>EIQ74285.1</b>     | <b><i>Shigella flexneri</i> 1235-66</b>         | <b>3961</b> | 258 | 2002 | <b>1745</b> | 2003 | 2358 | <b>356</b> | 2359 | 2543 | <b>185</b> | 2576 | 3320 | <b>745</b> |
| WP_051857422.1        | <i>Trabulsiella guamensis</i> ATCC 49490        | <b>3707</b> | 311 | 1438 | <b>1128</b> | 1439 | 1737 | <b>299</b> | 1738 | 1921 | <b>184</b> | 2102 | 2800 | <b>699</b> |
| WP_054181051.1        | <i>Trabulsiella odontotermitis</i> TbO1.1       | <b>3189</b> | 309 | 1262 | <b>954</b>  | 1263 | 1552 | <b>290</b> | 1553 | 1737 | <b>185</b> | 1908 | 2516 | <b>609</b> |
| WP_038156365.1        | <i>Trabulsiella guamensis</i> ATCC 49490        | <b>3299</b> | 311 | 1438 | <b>1128</b> | 1439 | 1731 | <b>293</b> | 1732 | 1915 | <b>184</b> | 2099 | 2696 | <b>598</b> |
| EEP92680.1            | <i>Yersinia kristensenii</i> ATCC 33638         | <b>3396</b> | 337 | 1484 | <b>1148</b> | 1485 | 1765 | <b>281</b> | 1766 | 1950 | <b>185</b> | 2182 | 2737 | <b>556</b> |
| WP_099461935.1        | <i>Yersinia massiliensis</i> SCPM-O-B-8024      | <b>3311</b> | 368 | 1484 | <b>1117</b> | 1485 | 1765 | <b>281</b> | 1766 | 1950 | <b>185</b> | 2126 | 2737 | <b>612</b> |
| CNE70603.1            | <i>Yersinia kristensenii</i> 119/84             | <b>3322</b> | 337 | 1484 | <b>1148</b> | 1485 | 1765 | <b>281</b> | 1766 | 1950 | <b>185</b> | 2182 | 2812 | <b>631</b> |
| WP_072087237.1        | <i>Yersinia frederiksenii</i> IP23698           | <b>3311</b> | 354 | 1484 | <b>1131</b> | 1485 | 1765 | <b>281</b> | 1766 | 1950 | <b>185</b> | 2126 | 2737 | <b>612</b> |
| CQJ01032.1            | <i>Yersinia frederiksenii</i> 112/02            | <b>2998</b> | 354 | 1484 | <b>1131</b> | 1485 | 1765 | <b>281</b> | 1766 | 1950 | <b>185</b> | 2126 | 2737 | <b>612</b> |
| WP_005186610.1        | <i>Yersinia intermedia</i> ATCC 29909           | <b>3435</b> | 397 | 1484 | <b>1088</b> | 1485 | 1765 | <b>281</b> | 1766 | 1950 | <b>185</b> | 2128 | 2737 | <b>610</b> |
| WP_050133220.1        | <i>Yersinia frederiksenii</i> BR166/97          | <b>2957</b> | 515 | 1074 | <b>560</b>  | 1075 | 1342 | <b>268</b> | 1343 | 1528 | <b>186</b> | 1705 | 2311 | <b>607</b> |
| WP_050536725.1        | <i>Yersinia mollaretii</i> 92/84                | <b>2964</b> | 304 | 1074 | <b>771</b>  | 1075 | 1342 | <b>268</b> | 1343 | 1528 | <b>186</b> | 1628 | 2376 | <b>749</b> |
| WP_050141948.1        | <i>Yersinia enterocolitica</i> YE8850           | <b>2964</b> | 307 | 1074 | <b>768</b>  | 1075 | 1342 | <b>268</b> | 1343 | 1528 | <b>186</b> | 1628 | 2376 | <b>749</b> |
| <b>WP_004876812.1</b> | <b><i>Yersinia mollaretii</i> ATCC 43969</b>    | <b>2963</b> | 418 | 1074 | <b>657</b>  | 1075 | 1342 | <b>268</b> | 1343 | 1528 | <b>186</b> | 1628 | 2376 | <b>749</b> |
| WP_050535527.1        | <i>Yersinia mollaretii</i> 61/02                | <b>2993</b> | 307 | 1074 | <b>768</b>  | 1075 | 1342 | <b>268</b> | 1343 | 1528 | <b>186</b> | 1628 | 2376 | <b>749</b> |

<sup>a</sup>The receptor-binding domain (RBD) was determined as the variable region between the last repeat of the FHA-1 region and the YPLP motif of the YP domain.

<sup>b</sup>The FHA-2 region was measured according to annotations on the NCBI server.

**Table S3. Oligonucleotides, Related to Figure STAR Methods.**

| Identifier | Descriptor                | Sequence <sup>a</sup>                                                                       |
|------------|---------------------------|---------------------------------------------------------------------------------------------|
| CH403      | T7-BgIII                  | 5' - AAA AGA TCT TAA TAC GAC TCA CTA TAG GAA TTG TGA GCG GAT AAC                            |
| CH2770     | minE-Nco-for              | 5' - TTT <u>CCA TGG</u> CAT TAC TCG ATT TCT TTC TCT C                                       |
| CH2771     | minE-Bam-rev              | 5' - TTT <u>GGA TCC</u> GGC TA TTT CAG CTC TTC TG                                           |
| CH4239     | STEC-Kpn-for              | 5' - CAG <u>CGG TAC CCT</u> CTC CG                                                          |
| CH4240     | STEC-L899-Xho-rev         | 5' - TTT <u>CTC GAG</u> CAG AGT GAT GTT CTG CCC C                                           |
| CH4241     | STEC-R1000-Xho-for        | 5' - AAA <u>CTC GAG</u> AGA GAC ATC AGC AAT AGT GGG C                                       |
| CH4243     | STEC-E1399-Xho-rev        | 5' - TTT <u>CTC GAG</u> CTC AAC CGG AAT GTA TGA TTT TGT C                                   |
| CH4244     | STEC-G1500-Xho-for        | 5' - AAA <u>CTC GAG</u> GGT TCA CAA CTG AAT AAT CAG TCC TTC                                 |
| CH4245     | STEC-A1853-Nco/Xho-rev    | 5' - TTT <u>CTC GAG CCA TGG</u> CTG CCA GGT GAA CAT TCT GAC                                 |
| CH4247     | STEC-V2323-Afl/Not-rev    | 5' - TTT <u>GCG GCC GCC TTA AGG</u> ACC GCA TTA TTG ATG GCA CTG                             |
| CH4282     | STEC-Afl/Sph-for          | 5' - TTT <u>GCA TGC TTA AGG</u> CCG GTG GTA ACA C                                           |
| CH4283     | STEC-S2917-Nhe/Xho-rev    | 5' - TTT <u>CTC GAG GCT AGC</u> GCT GCT GTT TCC GG                                          |
| CH4371     | STEC(3)-Nhe/Afl-for       | 5' - AAA <u>GCT AGC CTT AAG</u> GCC GGT GGT AAC AC                                          |
| CH4372     | STEC(3)-T2780-Sac-rev     | 5' - TTT <u>GAG CTC</u> CGT ATC ACG CAG TTT CGC AAG                                         |
| CH4373     | STEC(3)-L2881-Sac-for     | 5' - AAA <u>GAG CTC</u> CTG TAT CCG GGC GTG AAA C                                           |
| CH4374     | STEC(3)-Xho-rev           | 5' - TTT <u>CTC GAG</u> TGG CCG GAA TCT                                                     |
| CH4381     | STEC(3)-Y1657-Xho-rev     | 5' - TTT <u>CTC GAG</u> ATA GTT CCC CTC CAC GAT GC                                          |
| CH4382     | STEC(3)-G1708-Xho-for     | 5' - AAA <u>CTC GAG</u> GGG CAG GCA CCA CG                                                  |
| CH4383     | STEC(3)-P1707-Xho-rev     | 5' - TTT <u>CTC GAG</u> GGG GTG CAT CCT GAG C                                               |
| CH4384     | STEC(3)-Y1758-Xho-for     | 5' - AAA <u>CTC GAG</u> TAT ATG CTG AAC CAG ATC GGG G                                       |
| CH4412     | STEC(3)-N2934A-for        | 5' - AGA GCG GGA AGA ATG CTG TTG ATA ATG CCT ACC TGA GCG TG                                 |
| CH4413     | STEC(3)-A2918-Nhe-for     | 5' - AGC <u>GCT AGC</u> GCA GCA GTG GGC GCA CAG AGC GGG AAG AAT GC                          |
| ZR256      | tsx-Not-for               | 5' - TTT GCG GCC <u>GCG AAT TCG</u> GGA TTT TCA AAC AGT GGC ATA C                           |
| ZR257      | tsx-Xho-rev               | 5' - TTT CTC GAG <u>TCT AGA</u> AAA TCC CGG CAT TTT CAT AAT CAG                             |
| ZR260      | J2M139 CDI-Not-for        | 5' - TTT <u>GCG GCC GCA</u> ATG TCT GGT TGT GGC AGG                                         |
| ZR261      | J2M139 CDI-Xho-rev        | 5' - TTT <u>CTC GAG</u> TGG CCG GAA TCT TTA CTC AG                                          |
| ZR267      | cdiA(S504C)(STEC)Kpn-rev  | 5' - GAG <u>GGT ACC</u> GCA GTT GTT TAT CTG CGT GGC AC                                      |
| ZR268      | STEC-A498-Kpn-for         | 5' - GCC ACG CAG ATA AAC AAC AGC                                                            |
| ZR269      | STEC-cdiA(E512)-rev       | 5' - GTT CCT TTG CCC CGG AG                                                                 |
| ZR271      | cdiA(S1550C)(STEC)Sac-rev | 5' - CCG <u>GAG CTC</u> CAC AGA GAG TAA AGG TAA CGC GAT CAT C                               |
| ZR274      | STEC-D1692-Sal-rev        | 5' - GCT <u>GTC GAC</u> CTT TCC GAG ACC ATC CAG                                             |
| ZR275      | STEC-S1693C-Sal-for       | 5' - AAG <u>GTC GAC</u> TGT AGT CTG TTT GCC GGA CTG TAT GAC                                 |
| ZR277      | STEC-G1726C-Xba-rev       | 5' - CCG <u>GTC TAG</u> AAA ATA CGA TGA ACA CGG GAA TTG TTT TTC ATC AGT ATA CG              |
| ZR281      | STEC-L1731-Xba-for        | 5' - TTT <u>TCT AGA</u> CCG GCT CGG GCT GAA AC                                              |
| ZR280      | STEC-cdiA(A1807C)-Sex-for | 5' - CAG <u>ACC AGG TGG</u> CGT GTC TTG ACC AAA GTA TTC TGT GGT ATA AAG                     |
| ZR285      | STEC-cdiA(D1959)-rev      | 5' - GTC CAG ACT <u>ATC CAT GGC</u> AC                                                      |
| ZR286      | cdiA(D1959C)(STEC)Nco-for | 5' - GTG <u>CCA TGG</u> ATA GTC TGT GCA TCC GGG CAG ATA AAA ACA TTT CG                      |
| ZR287      | STEC-R1961-Not-rev        | 5' - TTT <u>GCG GCC GCG</u> GAT GTC CAG ACT <u>ATC CAT GG</u>                               |
| ZR288      | STEC-T2502C-Eco-rev       | 5' - ACC <u>AGA ATT CAG</u> GGT GAC ACA TTT ACC GCT GTC TGT TGT GG                          |
| ZR290      | STEC-N2506-Eco-for        | 5' - ACC <u>CTG AAT TCT</u> GGT CGG GAT ACG GTA CTG                                         |
| ZR293      | STEC-G2648-Spe-for        | 5' - TTT ACT AGT GGC AGC TTC GGG GAT AAA TTT C                                              |
| ZR294      | cdiA(S3217C)(STEC)Mfe-for | 5' - CCG <u>CAA TTG</u> GTT ATT GCA ATG CAA TAA AAA ATG GAT TAC AGG C                       |
| ZR295      | malE-Not-for              | 5' - TTT <u>GCG GCC GCC</u> AAC AAG GAC CAT AGA TTA TG                                      |
| ZR296      | malE-dSS-Not-for          | 5' - TTT <u>GCG GCC GCA</u> AGG ACC ATA GAT TAT GAA AAT CGA AGA AGG TAA ACT GG              |
| ZR297      | malE-CysHis6-Xho-rev      | 5' - TTT <u>CTC GAG</u> CTA GTG ATG GTG ATG GTG ATG AGA TCC ACC ACA CTT GGT GAT ACG AGT CTG |
| ZR347      | cdiA(A1954)(STEC)Not-for  | 5' - TTT <u>GCG GCC GCC ATG</u> GAT AGT CTG GAC ATC C                                       |
| ZR348      | cdiA(S2731C)(STEC)Bam-rev | 5' - TTT <u>GGA TCC</u> TAT GTC GCA GAT AAG CCC CAC TGT CTG C                               |
| ZR349      | cdiA(G2734)(STEC)Bam-for  | 5' - TTT <u>GGA TCC</u> CAG GTG GCG GAT ATC GCG                                             |

<sup>a</sup> Underlined residues indicate restriction endonuclease recognition sites.
